# Supplementary material
Source: PubMed Central journal article supplement (PMC2063473)

## Supplementary figure legends

**Figure 1** Linking of the GluR2 peptide to the carboxyl tail does not change the overall conformation of the PICK1 PDZ-GluR2 peptide complex. The overlay plot of the HSQC spectra of PICK1-3C-GluR2C with or without cleavage of the linker sequence by protease 3C. The insert shows the SDS-PAGE analysis of complete cleavage of the PICK1-3C-GluR2 linkage by protease 3C. Note that after protease 3C cleavage, PICK1 PDZ displayed a slightly smaller molecular weight than the uncleaved complex.

**Figure 2** Lipid membrane binding of the peptide ligand-free form PICK1 PDZ . PICK1 PDZ binds to lipid membrane in a peptide ligand independent manner. In this assay, B1 domain of Streptococcal protein G (GB1)-fused form of PICK1 PDZ also robustly binds to lipid membrane in liposome sedimentation assay. As the control, the GB1 domain showed no detectable lipid membrane binding.

**Figure 3** Substitution of Cys46 with a Gly does not alter the overall structure of the PICK1 PDZ and GluR2 peptide complex. (A) Overlay plot of the HSQC spectra of <sup>15</sup>N-labeled PICK1 PDZ-3C-GluR2 and the C46G mutant of PICK1 PDZ-3C-GluR2. The data show that the majority of the peaks from the two proteins overlap with each other well. (B) Plot as a function of the residue number of combined <sup>1</sup>H and <sup>15</sup>N chemical shift difference of PICK1 PDZ-3C-GluR2 and the C46G mutant of PICK1 PDZ-3C-GluR2. The combined <sup>1</sup>H and <sup>15</sup>N chemical shift changes are defined as:

$$\Delta_{\text{ppm}} = [(\Delta\delta_{HN})^2 + (\Delta\delta_N \times \alpha_N)^2]^{1/2}$$

Where  $\Delta\delta_{HN}$  and  $\Delta\delta_N$  represent chemical shift differences of amide proton and nitrogen chemical shifts of each residue of PICK1 PDZ. The scaling factor ( $\alpha_N$ ) used to normalize the  $^1\text{H}$  and  $^{15}\text{N}$  chemical shifts is 0.17.

**Figure 4** Mutation of Cys residues in the CPC-motif does not affect the GluR2 peptide to the PICK1 PDZ domain. Quantitative measurements of the binding affinities of the wild type PICK1 PDZ domain (A) and the CC-GG mutant (B) towards the GluR2 peptide using fluorescence polarization. Fluorescence polarization assay were performed on a PerkinElmer LS-55 fluorimeter equipped with an automated polarizer at 20 °C. The GluR2 peptide (from GeneScript Corporation) was labeled by fluorescein-5-isothiocyanate (FITC, from Molecular Probes) and purified by passing the reaction mixture through a Superdex Peptide HR 10/30 column (from GE healthcare). The labeled peptide (~1  $\mu\text{M}$ ) were titrated with increasing amount of binding proteins in 40 mM HEPES buffer containing 100 mM NaCl, 1 mM EDTA and 1 mM DTT (pH 7.4). The dissociation constant,  $K_d$ , for each titration reaction was derived by fitting the binding curve with the classical one-site binding equation.

**Figure 5:** Lipid membrane binding of the full-length PICK1. (A) The PICK1 CC-GG mutant has impaired lipid membrane binding. In this assay, we compared dose-dependent (0-160  $\mu\text{g/ml}$ ) lipid membrane bindings of the maltose binding protein (MBP)-fused form of the wild type PICK1 and its CC-GG mutant using liposome sedimentation assay. (B) Quantification of the liposome sedimentation assays of PICK1 shown in panel (B). Values are mean  $\pm$  SD of three individual experiments.

**Supplementary Table 1** Structural statistics for the family of 20 NMR structures of PICK1 PDZ-GluR2 peptide complex<sup>a</sup>

|                                                                                 |               |
|---------------------------------------------------------------------------------|---------------|
| Distance restraints                                                             |               |
| Intraresidue( $i-j=0$ )                                                         | 445           |
| Sequential( $ i-j =1$ )                                                         | 481           |
| Medium range( $2 \leq  i-j  \leq 4$ )                                           | 316           |
| Long range( $ i-j  \geq 5$ )                                                    | 764           |
| Hydrogen bonds                                                                  | 50            |
| Total                                                                           | 2056          |
| Dihedral angle restraints                                                       |               |
| $\Phi$                                                                          | 36            |
| $\Psi$                                                                          | 35            |
| Total                                                                           | 71            |
| Mean r.m.s. deviations from the experimental restraints                         |               |
| Distance (Å)                                                                    | 0.001±0.000   |
| Dihedral (°)                                                                    | 0.010±0.008   |
| Mean r.m.s. deviations from idealized covalent geometry                         |               |
| Bond (Å)                                                                        | 0.001±0.000   |
| Angle (°)                                                                       | 0.265±0.002   |
| Improper (°)                                                                    | 0.103±0.003   |
| Mean energies (kcal mol <sup>-1</sup> ) <sup>a</sup>                            |               |
| $E_{\text{NOE}}^b$                                                              | 0.20±0.03     |
| $E_{\text{cdih}}^b$                                                             | 0.00±0.00     |
| $E_{\text{L-J}}$                                                                | -348.91±18.98 |
| Ramachandran plot <sup>c</sup> (Residues 18-104 in PDZ and GluR2 <sup>d</sup> ) |               |
| % residues in the most favorable regions                                        | 76.7          |
| additional allowed regions                                                      | 21.0          |
| generously allowed regions                                                      | 1.9           |
| Atomic r.m.s. differences (Å)                                                   |               |
| Residues 19-40,47-103 in PDZ and GluR2 <sup>d</sup>                             |               |
| Backbone heavy atoms (N, C <sup>α</sup> , and C <sup>β</sup> )                  | 0.36          |
| Heavy atoms                                                                     | 0.75          |

<sup>a</sup>None of the structures exhibits distance violations greater than 0.3 Å or dihedral angle violations greater than 4°.

<sup>b</sup>The final values of the square-well NOE and dihedral angle potentials were calculated with force constants of 50 kcal mol<sup>-1</sup>Å<sup>-1</sup> and 200 kcal mol<sup>-1</sup>rad<sup>-1</sup>.

<sup>c</sup>The PROCHECK-NMR program (Laskowski et al,1996) was used to assess the overall quality of the structures.

<sup>d</sup>GluR2 refers to the last 5 amino acid residues(ESVKI) of the GluR2 subunit of the AMPA receptors.

# Supplementary Figure 1

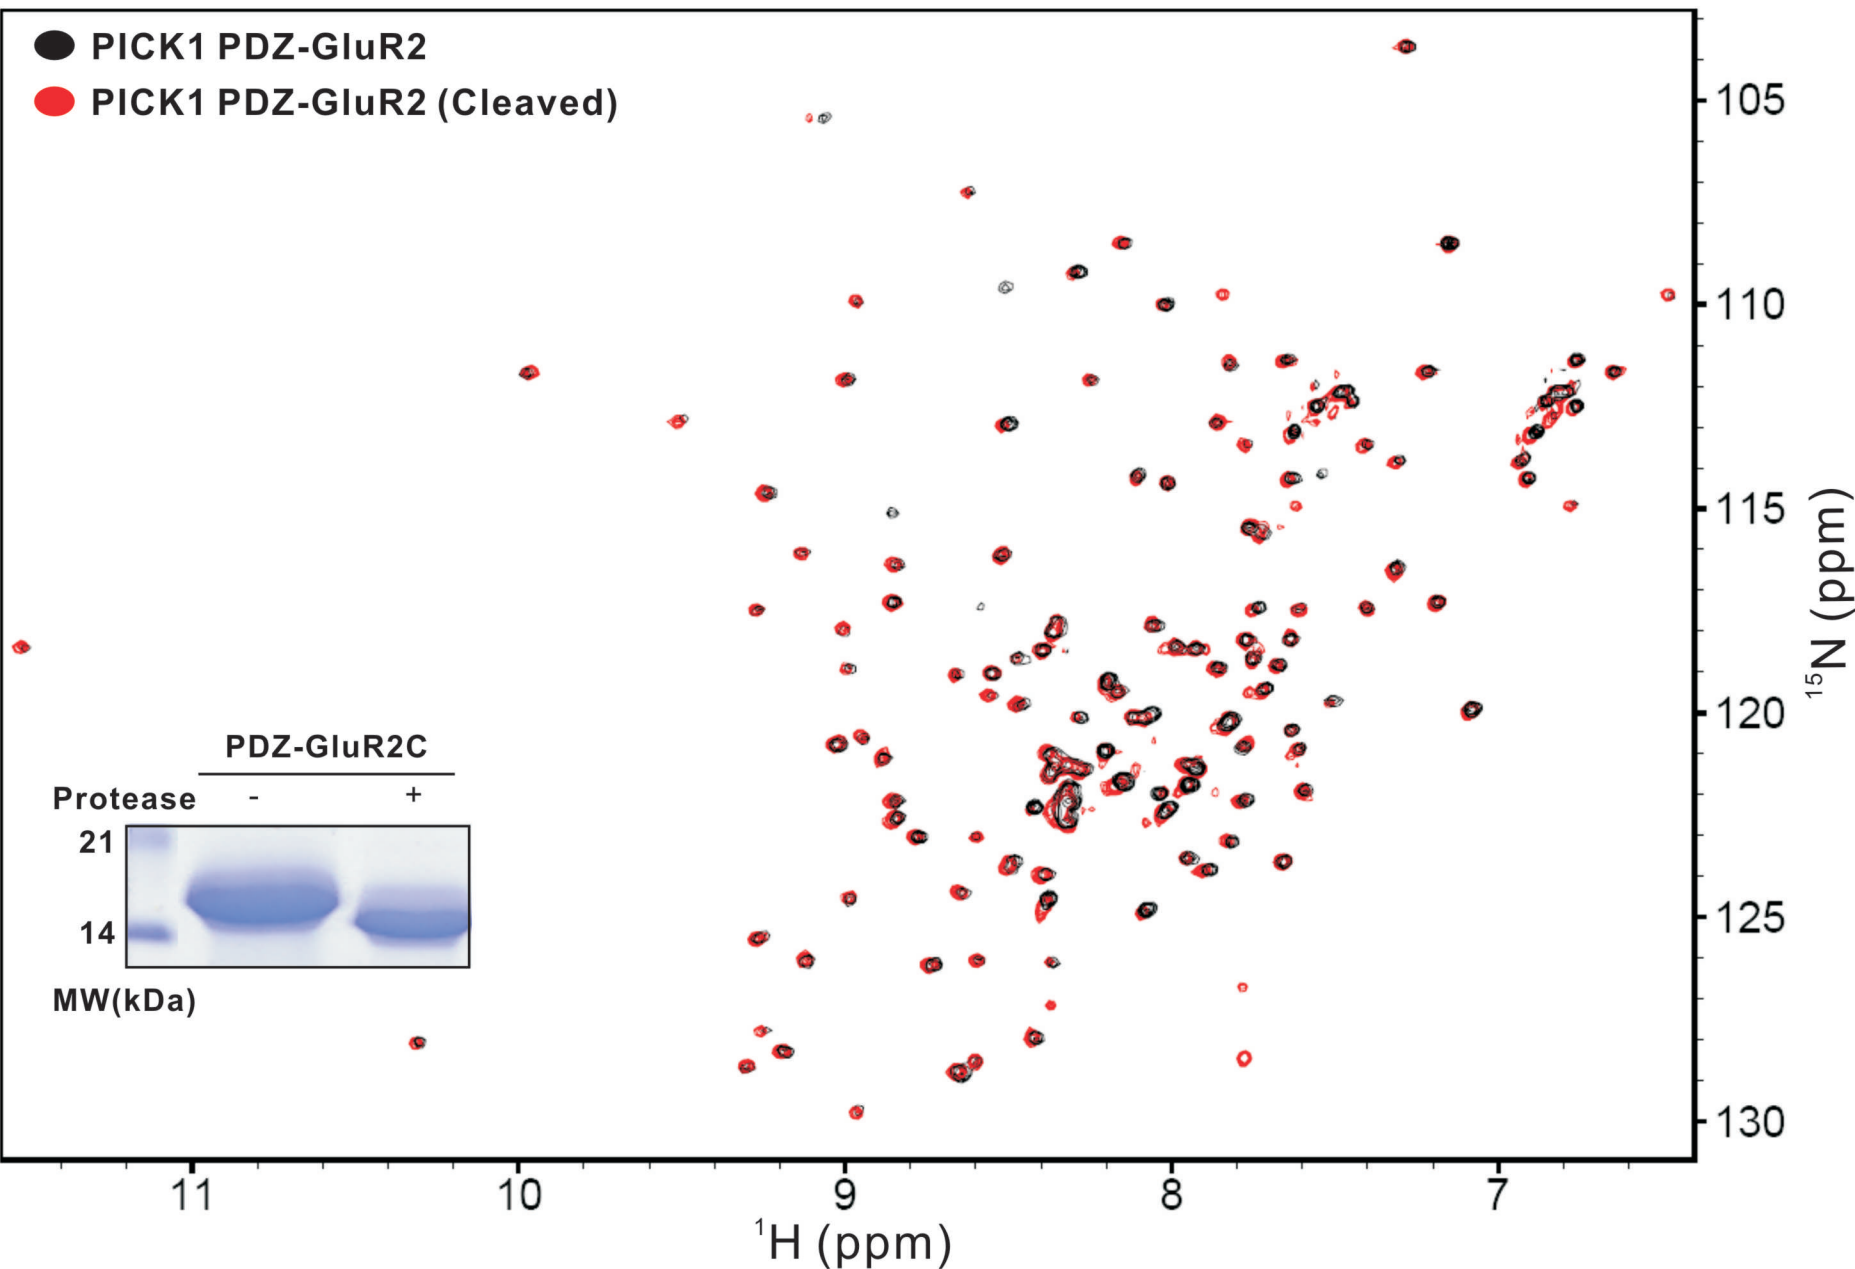

# Supplementary Figure 2

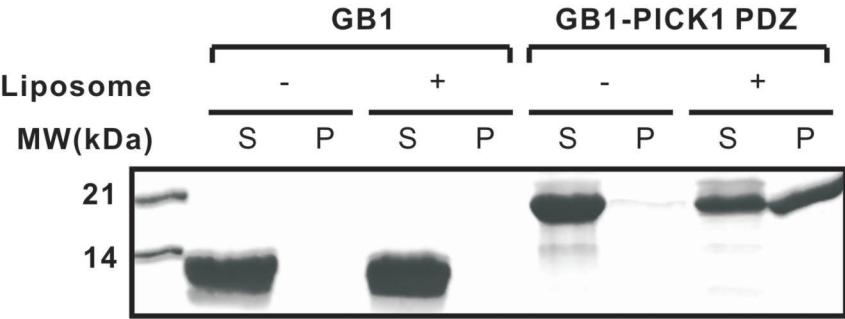

# Supplementary Figure 3

**A**
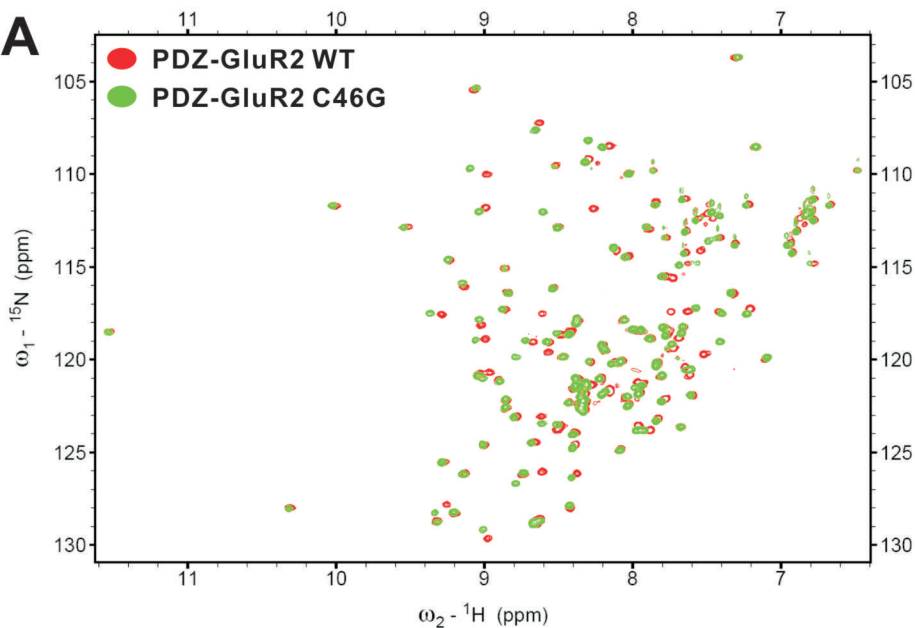
**B**
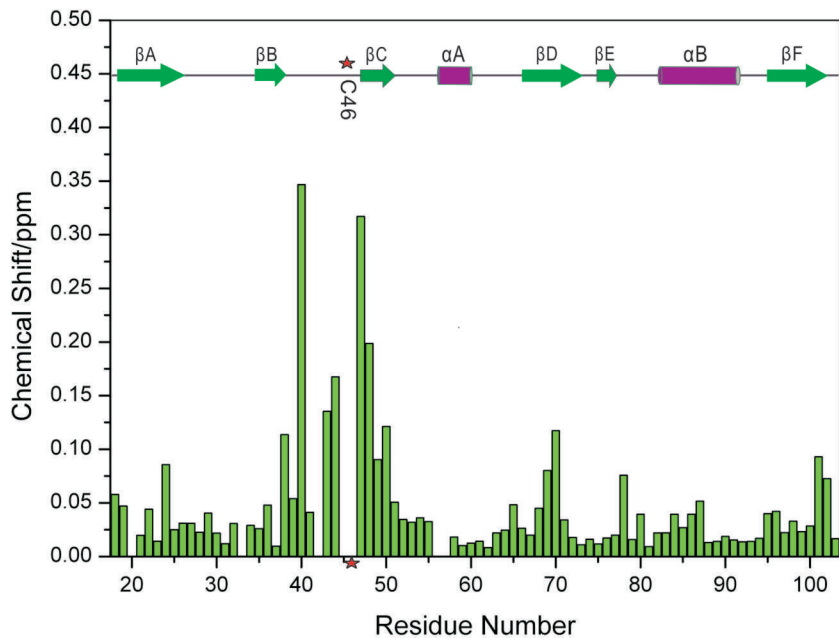

# Supplementary Figure 4

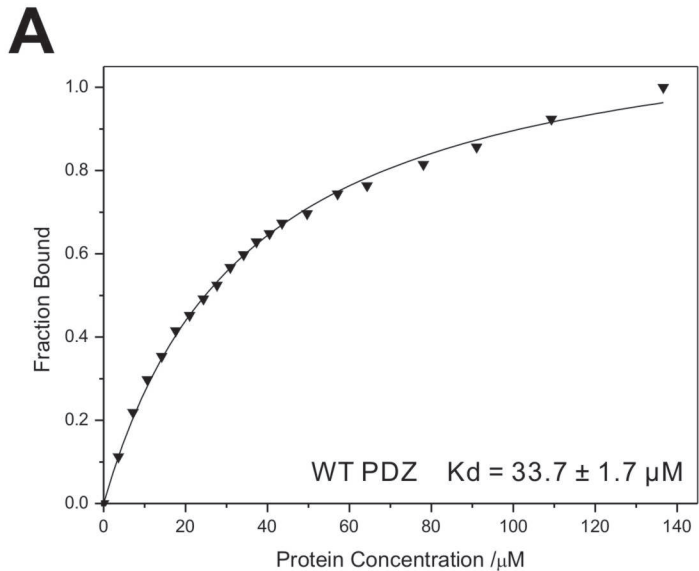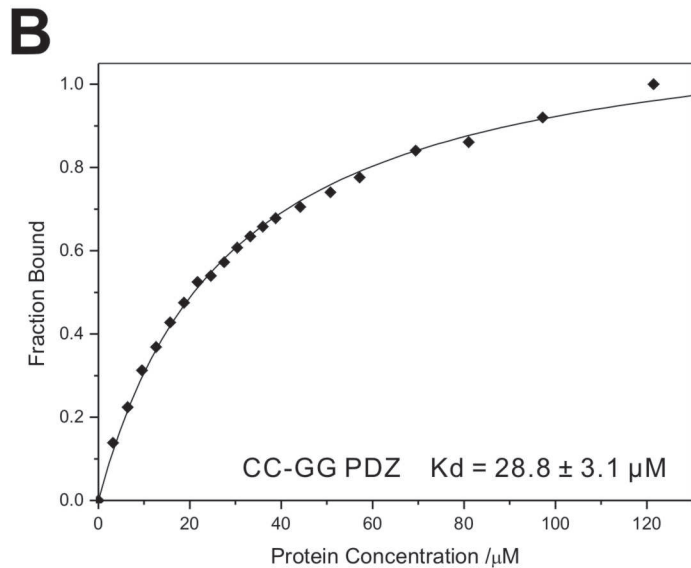

# Supplementary Figure 5

## A

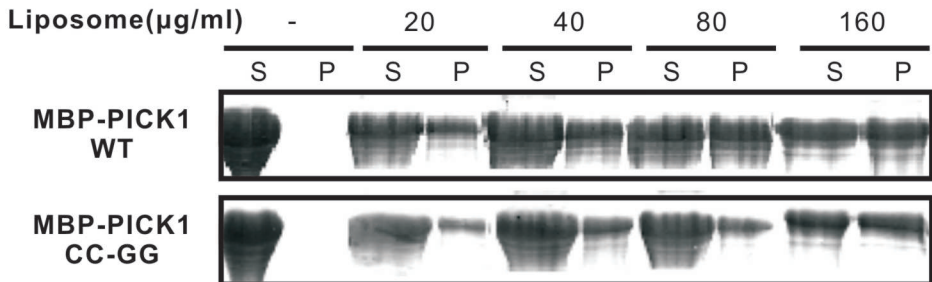

## B

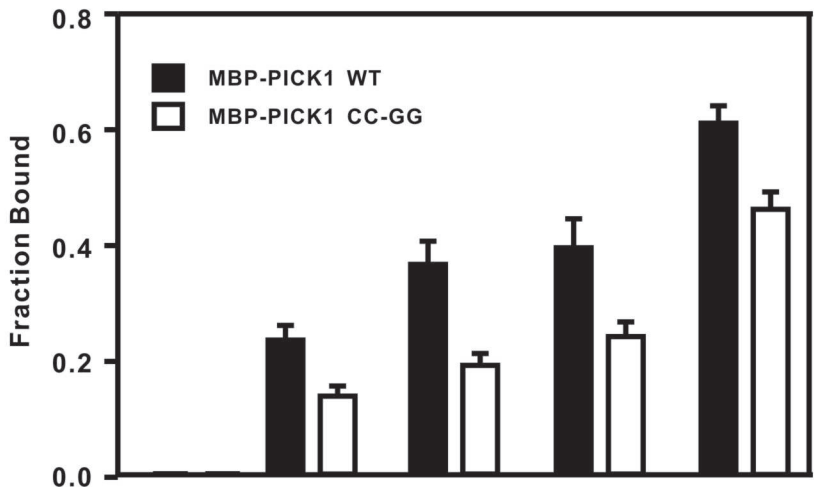

Supplement: 7601860s1.pdf [file 7601860s1.pdf]
